# Supplementary material
Source: MDPI journal article supplement (https://www.mdpi.com/2073-4433/14/2/374)
Supplement: s1 [file s1]

# Supplementary Materials: Continuous Measurements and Source Apportionment of Ambient PM<sub>2.5</sub>-Bound Elements in Windsor, Canada

Tianchu Zhang <sup>1</sup>, Yushan Su <sup>2,\*</sup>, Jerzy Debosz <sup>2</sup>, Michael Noble <sup>2</sup>, Anthony Munoz <sup>2</sup> and Xiaohong Xu <sup>1</sup>

<sup>1</sup> Department of Civil and Environmental Engineering, University of Windsor, Windsor, ON N9B 3P4, Canada; zhang14g@uwindsor.ca (T.Z.); xxu@uwindsor.ca (X.X.)

<sup>2</sup> Ontario Ministry of the Environment, Conservation and Parks, Toronto, ON M9P 3V6, Canada; jerzy.debosz@ontario.ca (J.D.); michael.noble@ontario.ca (M.N.); tony.munoz@ontario.ca (A.M.)

\* Correspondence: yushan.su@ontario.ca

## Equations Used to Estimate Uncertainty of Measured Concentrations [1]

When the concentration is less than or equal to the method detection limit (MDL):

$$Uncertainty = \frac{5}{6} \times MDL \quad (1)$$

When the concentration is greater than the MDL:

$$Uncertainty = \sqrt{(Error\ fraction \times concentration)^2 + (0.5 \times MDL)^2} \quad (2)$$

where error fractions for the 24 PM<sub>2.5</sub>-bound elements, black carbon and brown carbons are equal to 10% as suggested by other researchers (e.g., [2,3]).

## PMF Model Settings and the Approach to Determining the Optimal Number of Factors

The number of the starting seed was set to 5. An identical solution can be recreated later using the same seed number. Number of base runs was set to 20 because this will allow an evaluation of the variation in Q (goodness-of-fit parameter) as recommended in the PMF user manual [1]. The best run among the 20 runs was selected. In this study, all input species were classified as strong. Model outputs were stored in the format of Excel workbook, which allow an easy access and data processing.

In PMF modeling, the optimal number of PMF resolved factors is decided by the users. In this study, based on the number of potential sources and the number of measured species, the optimal number of PMF resolved factors should be between two and ten. Thus, the PMF model simulations were conducted from two to ten factors to determine an optimal number of factors. IM (maximum individual column mean) and IS (maximum individual column standard deviation) were used to select the number of factors in PMF [4]. When the number of factors increases to the optimal number, IM and IS will experience a drastic drop. In this study, IM and IS values dropped dramatically when number of factors reaching to five (Figure S1). Q (robust) and Q (true) are two additional indicators to reflect the goodness-of-fit by the model, which were also used to identify the optimal number of factors. The smaller Q values indicate a better fit by the PMF model. Similar to IS and IM, a drastic drop of Q (robust) and Q (true) indicating the optimal number of factors is achieved. In this study, there isn't a drastic drop of Q (robust) and Q (true), but the dropping rate becomes slow when the number of factors reaching to six (Figure S2). Five factors were selected based on these indicators (IS, IM, Q robust, and Q true) and the interpretability of the resolved source profiles.

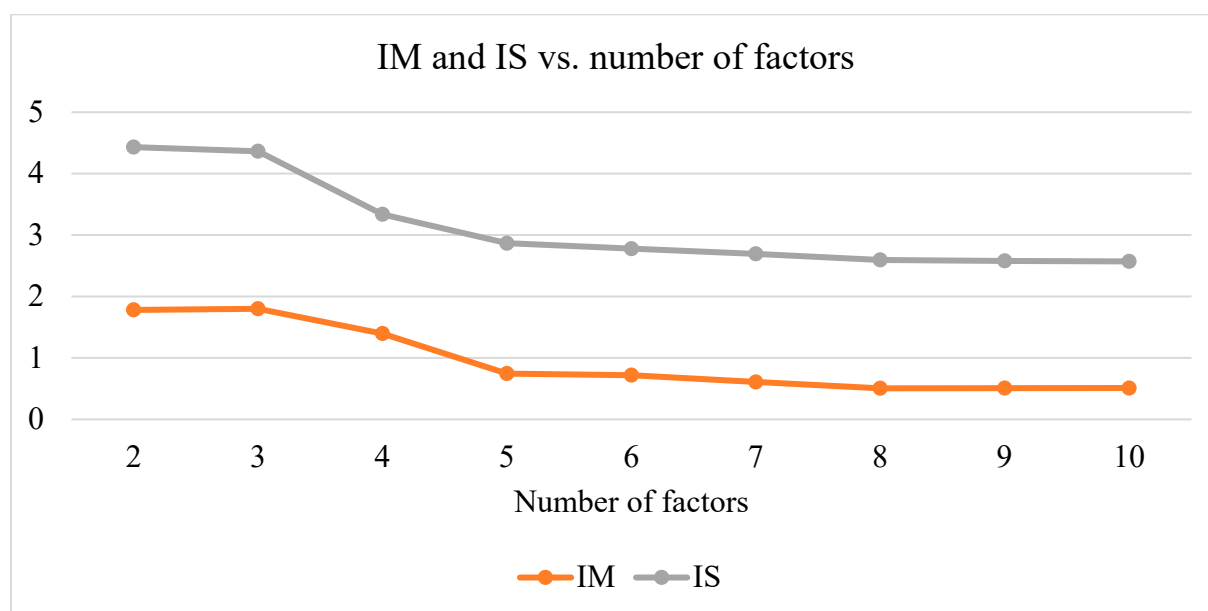

**Figure S1.** IM and IS vs. number of factors.

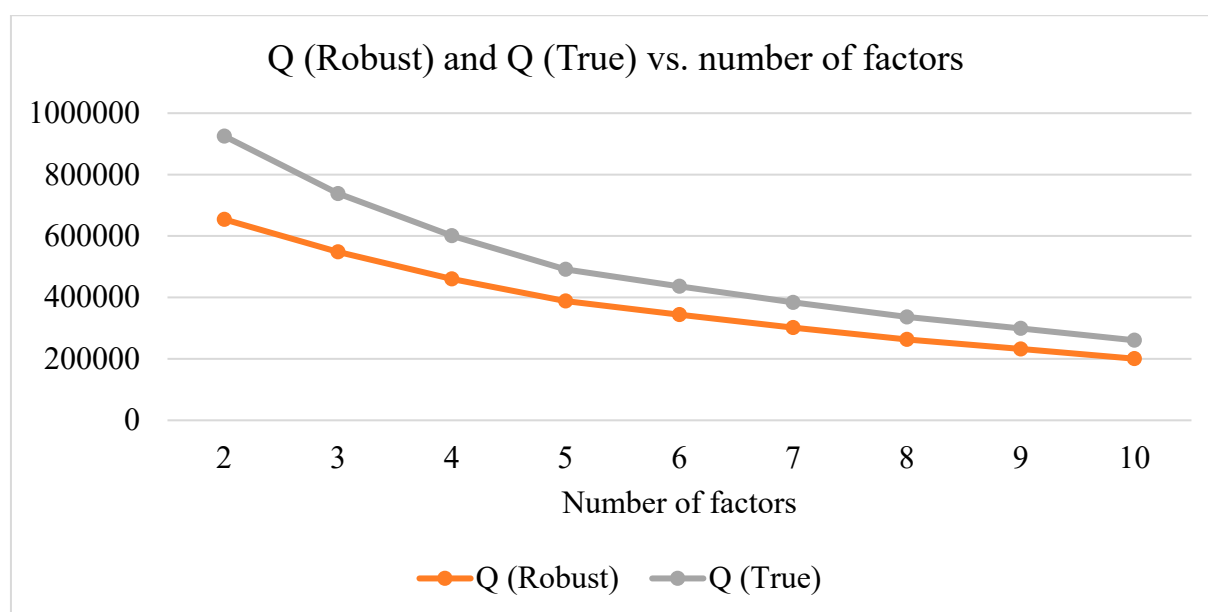

**Figure S2.** Q (Robust) and Q (True) vs. number of factors.

The PMF factors were interpreted by comparing the major variables (>20% of mass percentage) in each factor to markers and source profiles in the literatures, taking into consideration of emission inventories from National Pollutant Release Inventory (Canada) and National Emissions Inventory (USA).

**Table S1.** Average concentrations of PM<sub>2.5</sub>-bound elements measured by the Xact 625 analyzer from April to October 2021 at Windsor West, and by the Dichot method as described in Dabek-Zlotorzynska et al., [5] in 2017–2019 at seven 7 stations in Ontario. Site classification and source influences were obtained from Environment and Climate Change Canada website [6].

| Element | This Study, Average Xact Concentration at Windsor West (ng/m <sup>3</sup> ) | Average Dichot Concentrations in 2017–2019 (ng/m <sup>3</sup> ) |                                                    |                                          |                                                    |                                                       |                                                      |                                         |
|---------|-----------------------------------------------------------------------------|-----------------------------------------------------------------|----------------------------------------------------|------------------------------------------|----------------------------------------------------|-------------------------------------------------------|------------------------------------------------------|-----------------------------------------|
|         |                                                                             | Windsor West (Urban, Transport Source Influenced)               | Hamilton Downtown (Urban, Point Source Influenced) | Sudbury (Urban, Point Source Influenced) | Toronto North (Urban, General Population Exposure) | Hwy 401 Roadside (Urban, Transport Source Influenced) | Ottawa Downtown (Urban, General Population Exposure) | Simcoe (Suburban, Regional Backgrounds) |
| Br      | 3.2                                                                         | 2.3                                                             | 2.0                                                | 1.3                                      | 1.5                                                | 1.4                                                   | 1.4                                                  | 1.6                                     |
| Ca      | 89                                                                          | 62                                                              | 48                                                 | 15                                       | 43                                                 | 85                                                    | 38                                                   | 37                                      |
| Fe      | 118                                                                         | 112                                                             | 70                                                 | 37                                       | 62                                                 | 223                                                   | 27                                                   | 26                                      |
| K       | 115                                                                         | 52                                                              | 48                                                 | 34                                       | 42                                                 | 43                                                    | 40                                                   | 35                                      |
| Mn      | 4.6                                                                         | 3.7                                                             | 2.9                                                | 0.9                                      | 2.0                                                | 2.7                                                   | 1.2                                                  | 1.4                                     |
| Pb      | 3.9                                                                         | 3.6                                                             | 3.5                                                | 3.2                                      | 3.2                                                | 3.0                                                   | 2.7                                                  | 2.9                                     |
| S       | 600                                                                         | 422                                                             | 509                                                | 222                                      | 318                                                | 330                                                   | 225                                                  | 368                                     |
| Se      | 0.7                                                                         | 0.9                                                             | 0.8                                                | 0.7                                      | 0.7                                                | 0.7                                                   | 0.7                                                  | 0.7                                     |
| Si      | 407                                                                         | 43                                                              | 33                                                 | 65                                       | 34                                                 | 57                                                    | 31                                                   | 32                                      |
| Sr      | 1.6                                                                         | 1.4                                                             | 1.4                                                | 1.0                                      | 1.5                                                | 1.6                                                   | 1.3                                                  | 1.4                                     |
| Ti      | 4.1                                                                         | 1.9                                                             | 1.9                                                | 2.0                                      | 3.0                                                | 8.4                                                   | 3.4                                                  | 1.4                                     |
| Zn      | 26                                                                          | 23                                                              | 19                                                 | 4                                        | 20                                                 | 22                                                    | 6                                                    | 7                                       |

**Table S2.** Statistics of 24-h concentrations for 14 PM<sub>2.5</sub>-bound elements with ≥50% MDL in this study and Ontario's Ambient Air Quality Criteria (AAQC) [7].

| Element | Minimum (ng/m <sup>3</sup> ) | Maximum (ng/m <sup>3</sup> ) | Average (ng/m <sup>3</sup> ) | Median (ng/m <sup>3</sup> ) | Standard Deviation (ng/m <sup>3</sup> ) | 24-h AAQC for the PM <sub>2.5</sub> Fraction (ng/m <sup>3</sup> ) | 24-h AAQC for the PM <sub>10</sub> Fraction (ng/m <sup>3</sup> ) | 24-h AAQC for the TSP Fraction (ng/m <sup>3</sup> ) | Derived 24-h AAQC for the PM <sub>2.5</sub> Fraction (ng/m <sup>3</sup> ) |
|---------|------------------------------|------------------------------|------------------------------|-----------------------------|-----------------------------------------|-------------------------------------------------------------------|------------------------------------------------------------------|-----------------------------------------------------|---------------------------------------------------------------------------|
| Br      | 0.2                          | 8.6                          | 3.2                          | 2.9                         | 1.7                                     | NA                                                                | NA                                                               | NA                                                  | NA                                                                        |
| Ca      | 8                            | 432                          | 86                           | 59                          | 74                                      | NA                                                                | NA                                                               | NA                                                  | NA                                                                        |
| Cu      | 2.1                          | 21.7                         | 4.0                          | 3.6                         | 2.1                                     | NA                                                                | NA                                                               | 50,000                                              | 12,500                                                                    |
| Fe      | 19                           | 1276                         | 116                          | 82                          | 127                                     | NA                                                                | NA                                                               | 4000                                                | 1000                                                                      |
| Hg      | 0.3                          | 1.3                          | 0.6                          | 0.6                         | 0.2                                     | NA                                                                | NA                                                               | NA                                                  | NA                                                                        |
| K       | 42                           | 245                          | 91                           | 82                          | 35                                      | NA                                                                | NA                                                               | 120,000                                             | 3000                                                                      |
| Mn      | 0.3                          | 28.6                         | 4.4                          | 2.9                         | 4.5                                     | 100                                                               | 200                                                              | 400                                                 | 100                                                                       |
| Pb      | 0.8                          | 25.0                         | 3.8                          | 3.4                         | 2.9                                     | NA                                                                | NA                                                               | 500                                                 | 125                                                                       |
| S       | 29                           | 2313                         | 581                          | 488                         | 443                                     | NA                                                                | NA                                                               | NA                                                  | NA                                                                        |
| Se      | 0.1                          | 3.0                          | 0.7                          | 0.5                         | 0.6                                     | NA                                                                | NA                                                               | 10,000                                              | 2500                                                                      |
| Si      | 204                          | 1398                         | 391                          | 353                         | 161                                     | NA                                                                | 10,000                                                           | NA                                                  | 5000                                                                      |
| Sr      | 0.5                          | 4.0                          | 1.1                          | 0.9                         | 0.6                                     | NA                                                                | NA                                                               | 120,000                                             | 30,000                                                                    |
| Ti      | 0.9                          | 20.7                         | 3.9                          | 3.1                         | 3.0                                     | NA                                                                | NA                                                               | 120,000                                             | 30,000                                                                    |
| Zn      | 2                            | 123                          | 25                           | 15                          | 26                                      | NA                                                                | NA                                                               | 120,000                                             | 30,000                                                                    |

Note: Twenty-four-hour AAQCs are available for 9 out of the 14 elements in the total suspended particulate (TSP) fraction, for two elements in the PM<sub>10</sub> fraction, and for one element in the PM<sub>2.5</sub> fraction. The comparison among Mn's AAQCs reveals that the AAQC for the TSP fraction is two times that of the AAQC for the PM<sub>10</sub> fraction and four times that of the AAQC for the PM<sub>2.5</sub> fraction. The 24-h AAQC for the PM<sub>2.5</sub> fraction were calculated from the TSP or PM<sub>10</sub> fraction if it is not available to compare with daily averages in this study. Four elements do not have AAQC (i.e., Br, Ca, Hg, and S).

**Table S3.** Factor profiles (% of species mass concentrations being assigned to that factor) for black carbon (BC) and brown carbons (BrC1 and BrC2), and PM<sub>2.5</sub>-bound elements in Windsor during April–October 2021. Bold values are percentages  $\geq 40\%$ .

| Species | Coal/Heavy Oil Burning | Vehicular Exhaust | Metal Processing | Crustal Dust | Vehicle Brake and Tire Wear |
|---------|------------------------|-------------------|------------------|--------------|-----------------------------|
| BC      | 19                     | <b>72</b>         | 3                | 6            | 0                           |
| BrC1    | 0                      | <b>93</b>         | 6                | 0.10         | 2                           |
| BrC2    | 2                      | <b>90</b>         | 0                | 6            | 1                           |
| Ag      | 17                     | 6                 | <b>73</b>        | 3            | 0                           |
| As      | 18                     | <b>75</b>         | 0                | 0            | 7                           |
| Ba      | 6                      | 31                | 30               | 31           | 2                           |
| Br      | <b>69</b>              | 14                | 12               | 5            | 0                           |
| Ca      | 6                      | 0                 | 2                | <b>90</b>    | 3                           |
| Cd      | 18                     | 11                | <b>71</b>        | 0.08         | 0                           |
| Co      | 0                      | 18                | <b>82</b>        | 0            | 0                           |
| Cr      | 27                     | 27                | 8                | 28           | 10                          |
| Cu      | 13                     | 18                | <b>44</b>        | 14           | 11                          |
| Fe      | 8                      | 4                 | 7                | <b>55</b>    | 26                          |
| Hg      | 2                      | 0                 | <b>92</b>        | 0            | 6                           |
| K       | 27                     | 17                | <b>42</b>        | 15           | 0                           |
| Mn      | 1                      | 0                 | 7                | 35           | <b>58</b>                   |
| Ni      | 19                     | 11                | <b>54</b>        | 14           | 1                           |
| Pb      | <b>43</b>              | 27                | 23               | 5            | 2                           |
| Rb      | 6                      | 8                 | <b>77</b>        | 9            | 0                           |
| S       | <b>82</b>              | 0                 | 14               | 2            | 2                           |
| Se      | <b>72</b>              | 4                 | 20               | 0            | 4                           |
| Si      | 16                     | 1                 | <b>56</b>        | 27           | 0                           |
| Sn      | 11                     | <b>89</b>         | 0                | 0            | 0                           |
| Sr      | 17                     | 10                | <b>41</b>        | 32           | 1                           |
| Ti      | 20                     | 7                 | 13               | <b>59</b>    | 1                           |
| V       | <b>53</b>              | 0.8               | 29               | 15           | 2                           |
| Zn      | 3                      | 0.8               | 12               | 5            | <b>79</b>                   |

**Table S4.** Pearson correlation coefficients of weekly averaged contributions among the five factors identified by the PMF.

|                             | Coal/Heavy Oil Burning | Vehicular Exhaust | Metal Processing | Crustal Dust |
|-----------------------------|------------------------|-------------------|------------------|--------------|
| Vehicular exhaust           | 0.504                  |                   |                  |              |
| Metal processing            | 0.813                  | 0.601             |                  |              |
| Crustal dust                | 0.525                  | 0.670             | 0.695            |              |
| Vehicle tire and brake wear | 0.527                  | 0.553             | 0.815            | 0.877        |



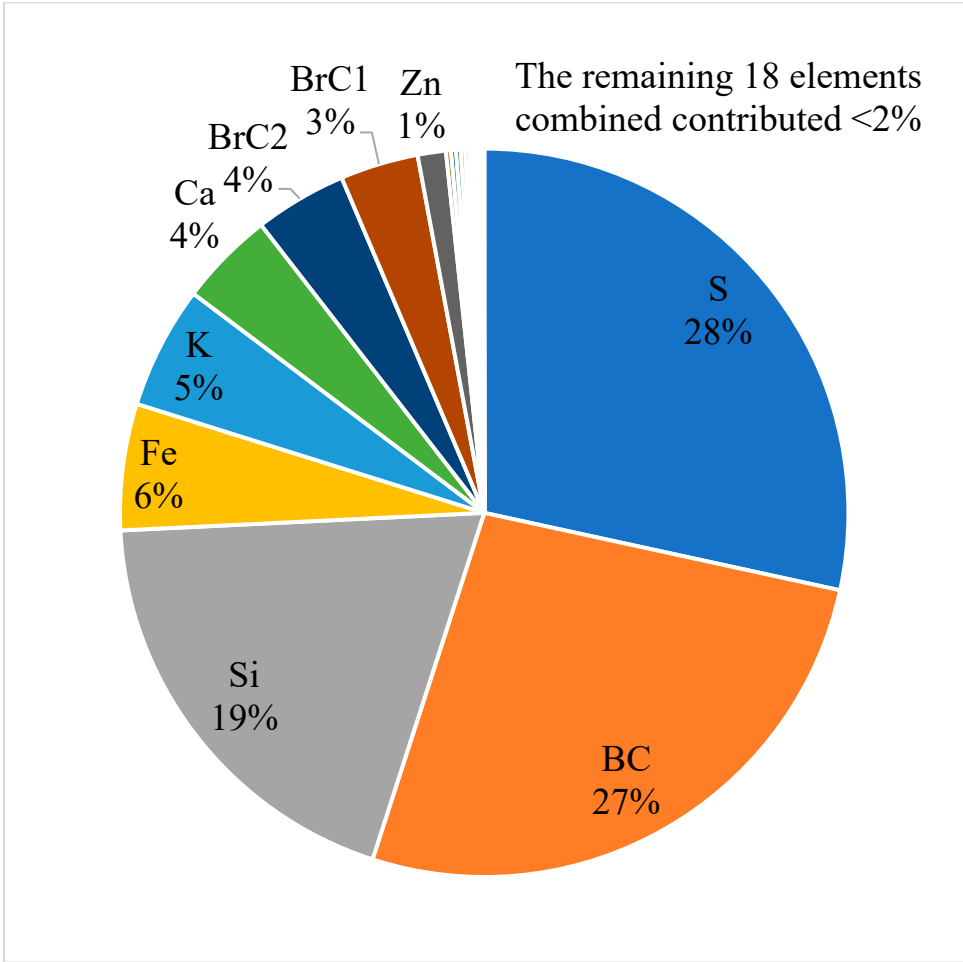

**Figure S3.** Relative contributions of black carbon (BC) and brown carbons (BrC1 and BrC2) and 24 PM<sub>2.5</sub>-bound elements. The total contributions by the 18 elements (Cu, Mn, Cd, Ti, Pb, Br, Ba, Ag, Sr, Se, Hg, Ni, V, Cr, As, Sn, Rb, and Co) was 1.7%.

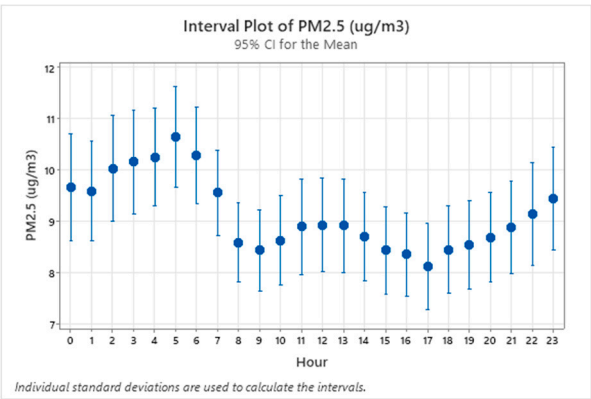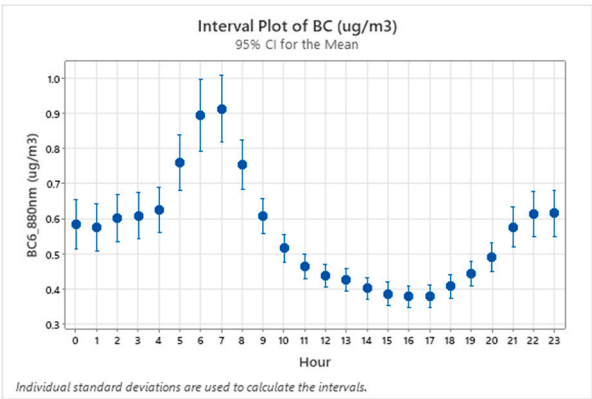

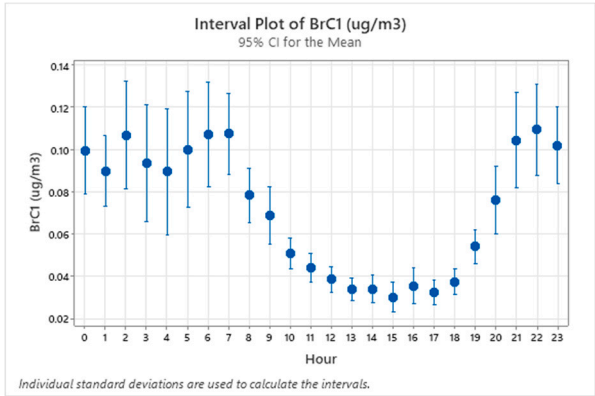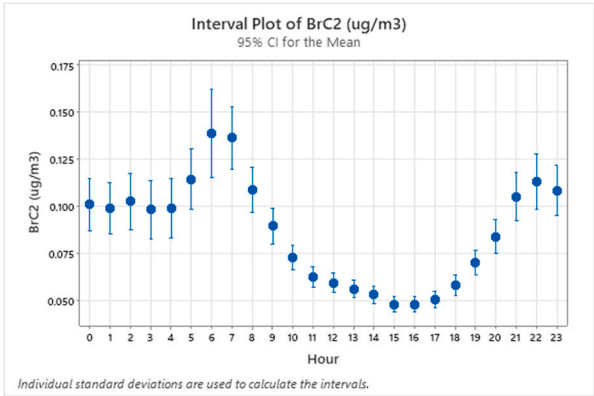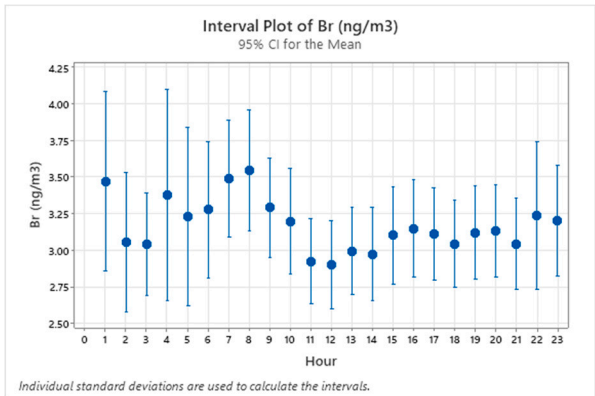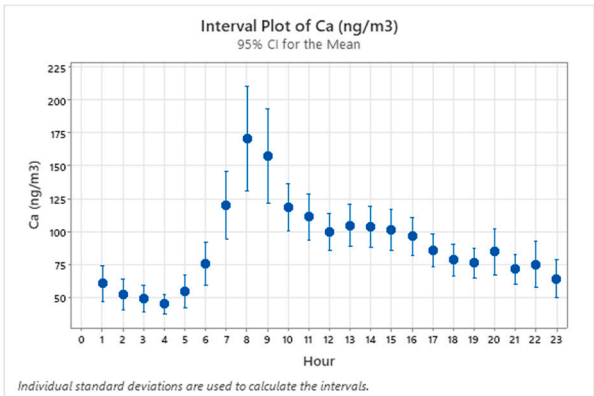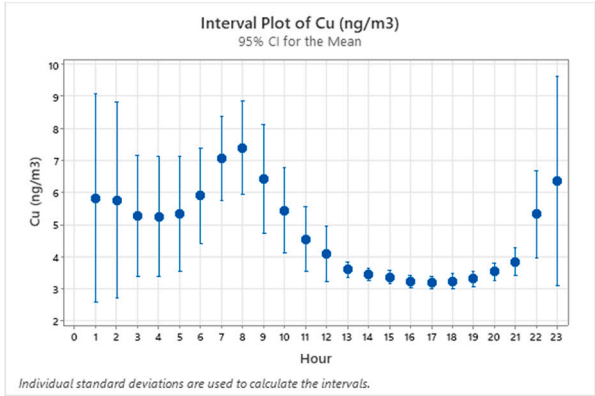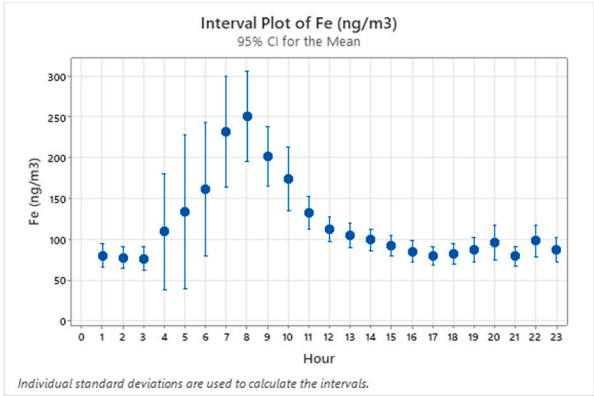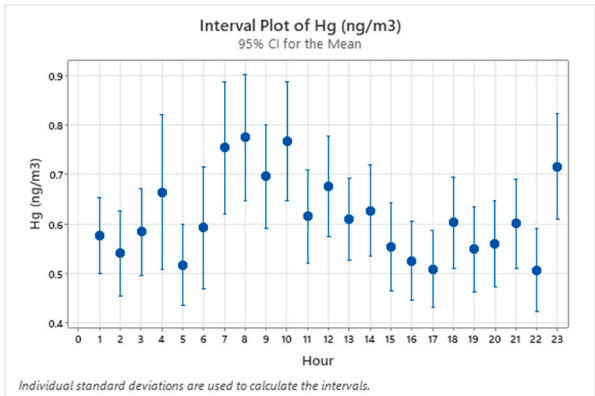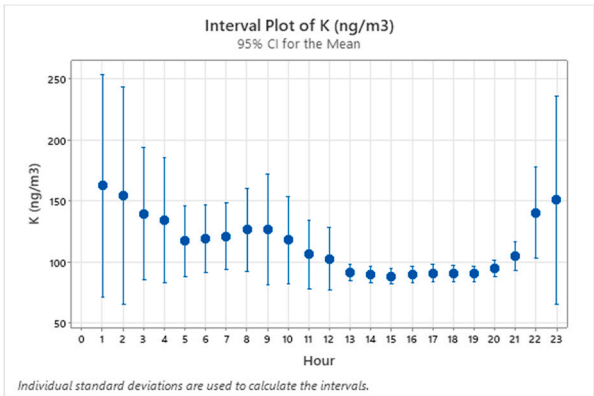

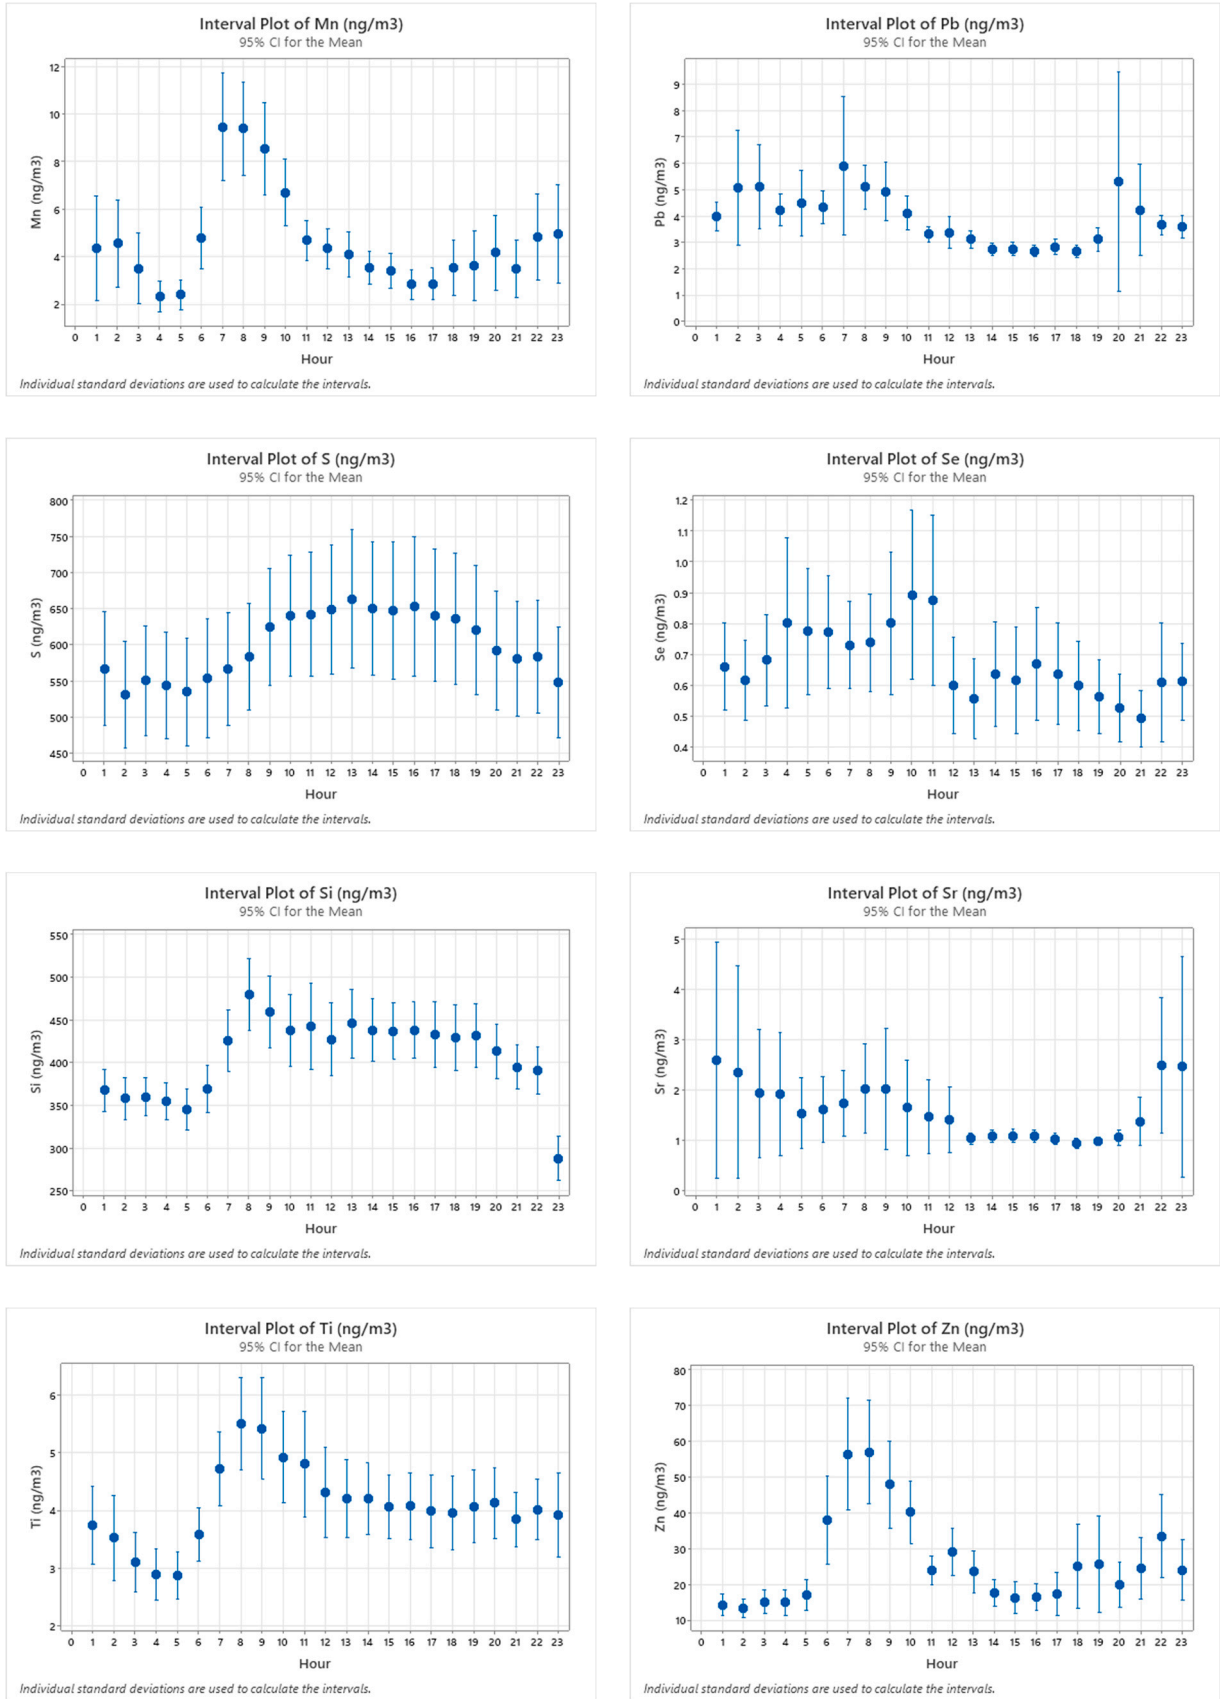

**Figure S4.** Diurnal variations of PM<sub>2.5</sub>, BC, brown carbons (BrC1 and BrC2), and PM<sub>2.5</sub>-bound element concentrations. The dots indicate the mean values and the error bars represent the 95% confidence intervals.

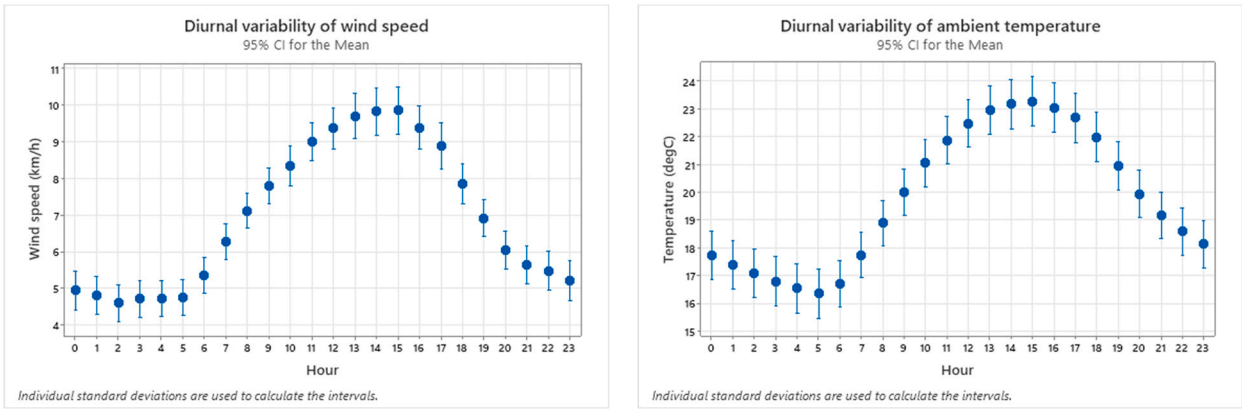

**Figure S5.** Diurnal variations of wind speed (left) and ambient temperature (right). The dots indicate the mean values and the error bars represent the 95% confidence intervals.

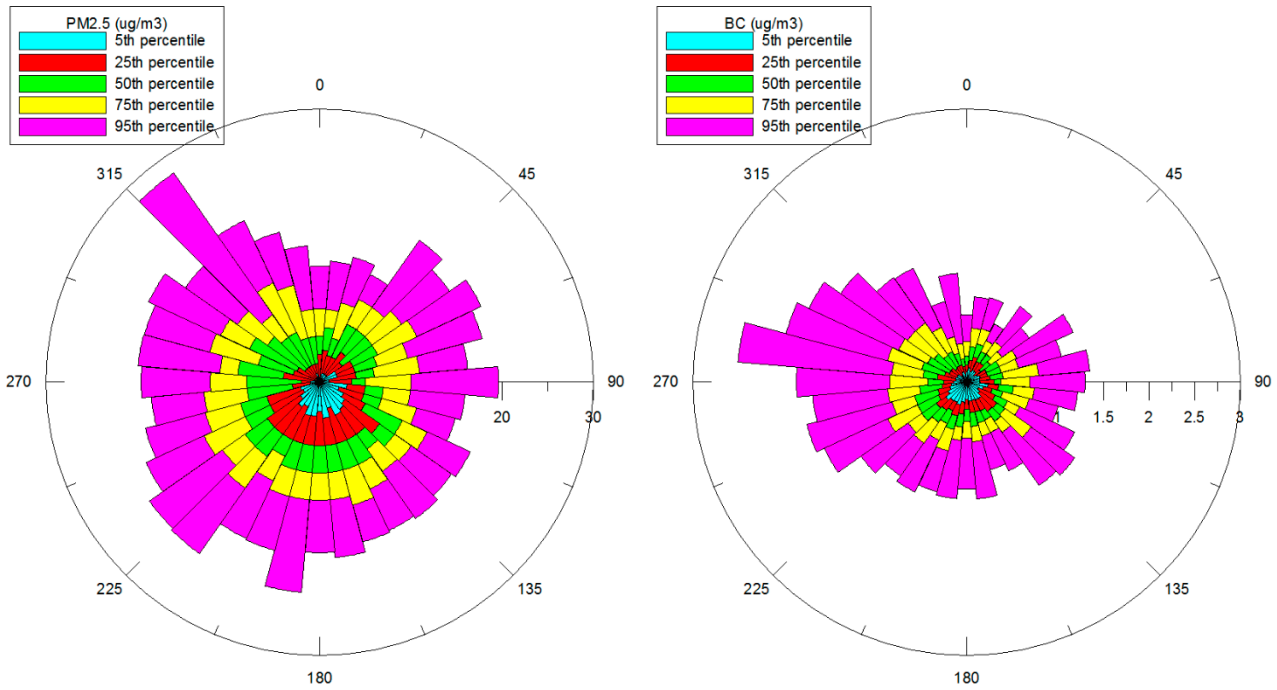

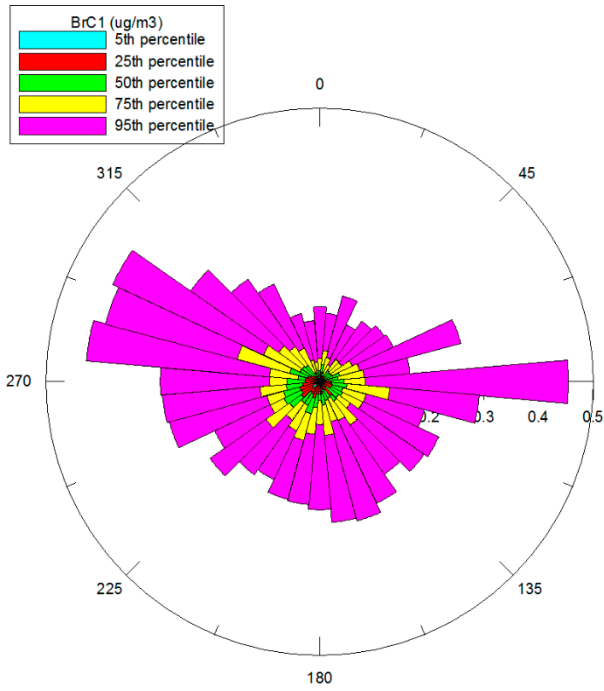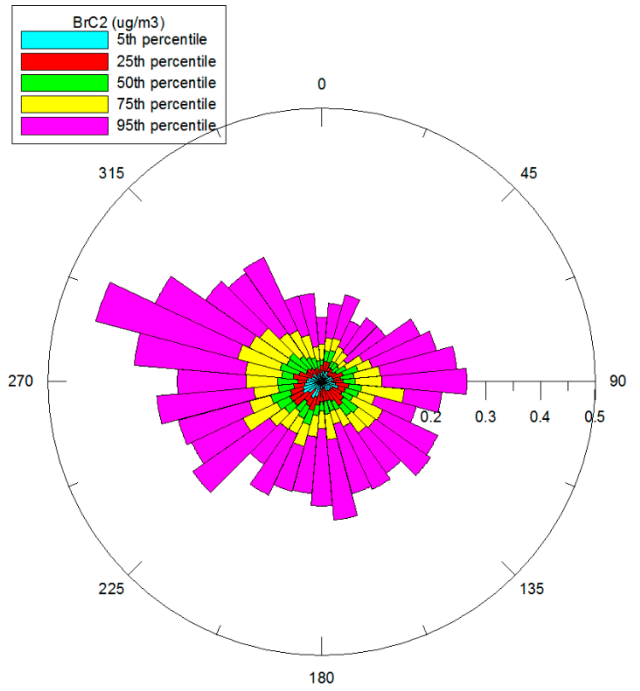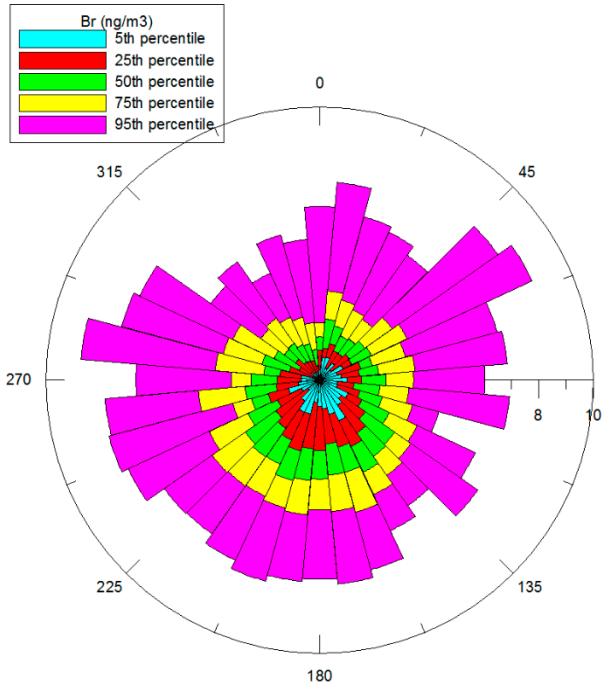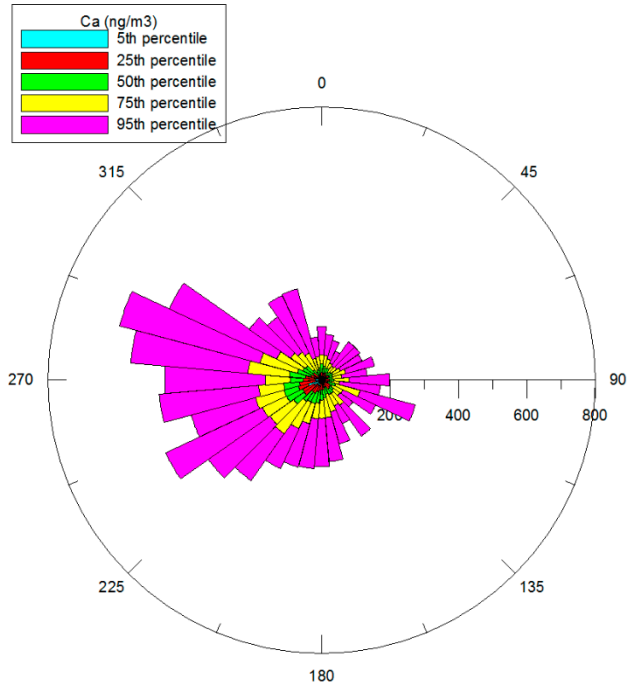

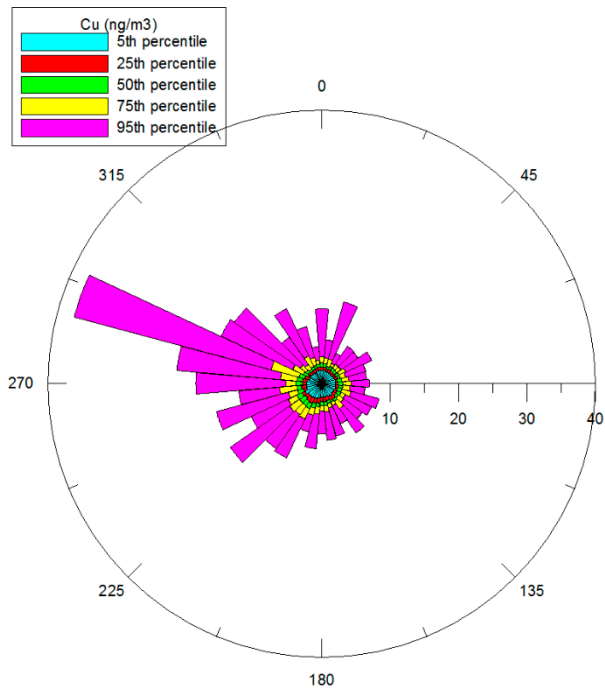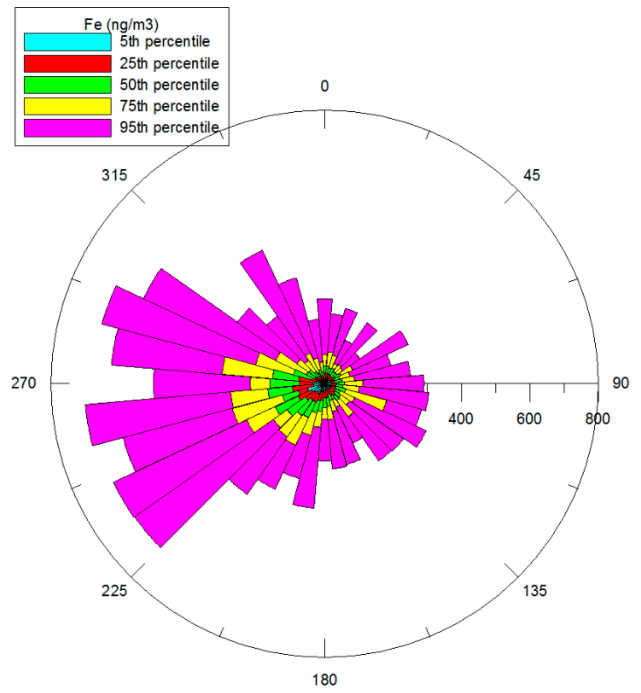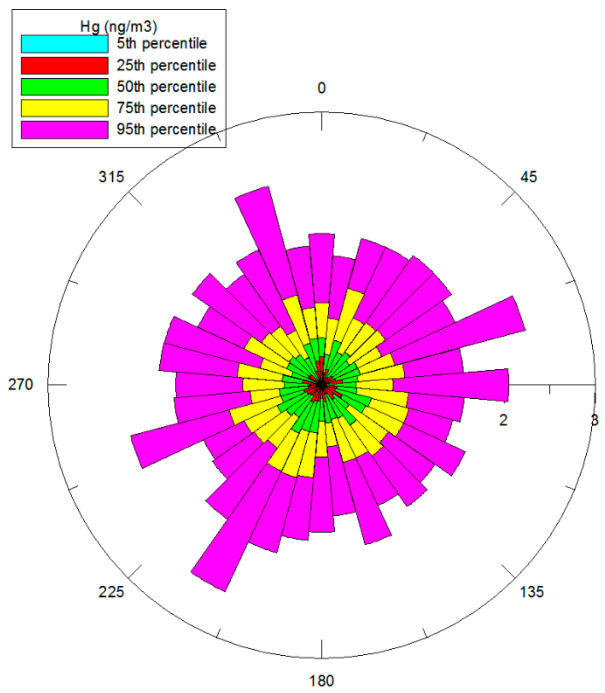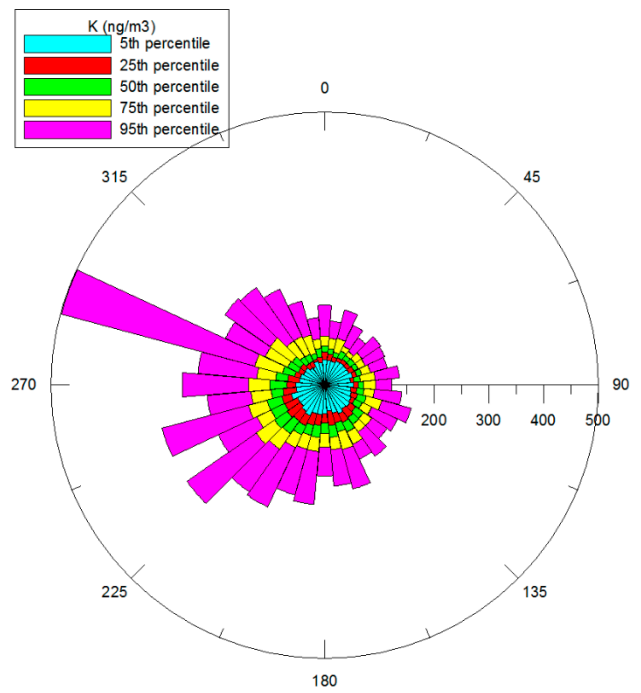

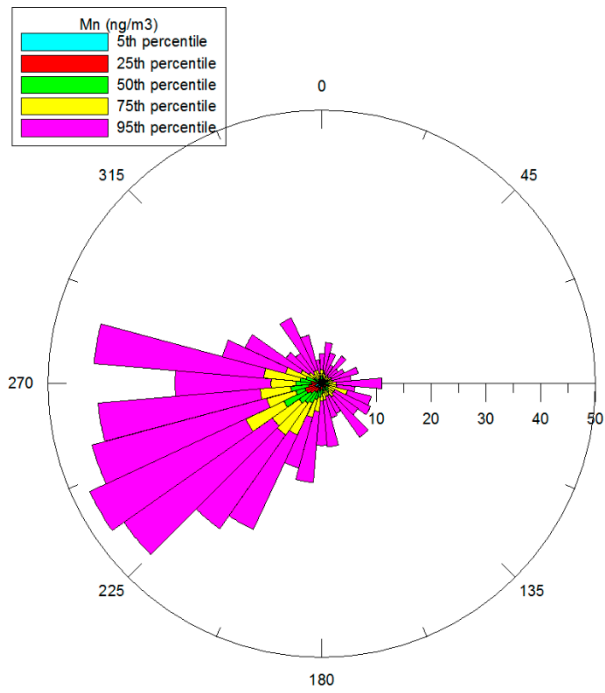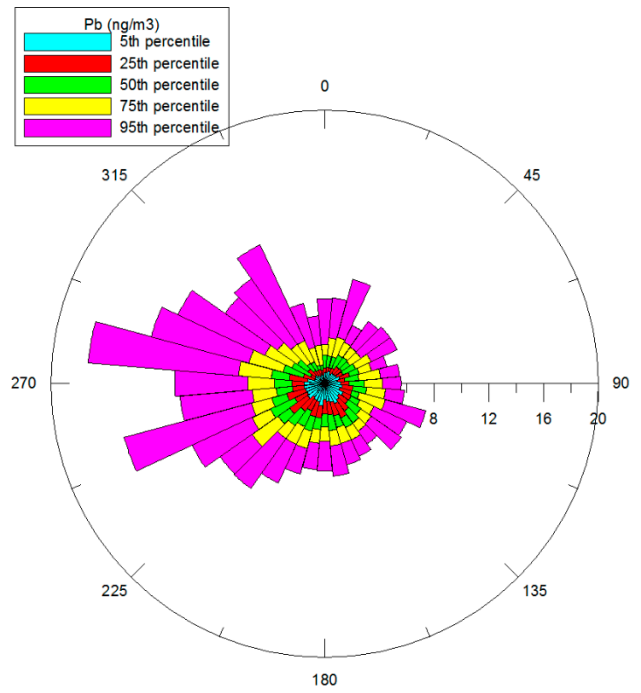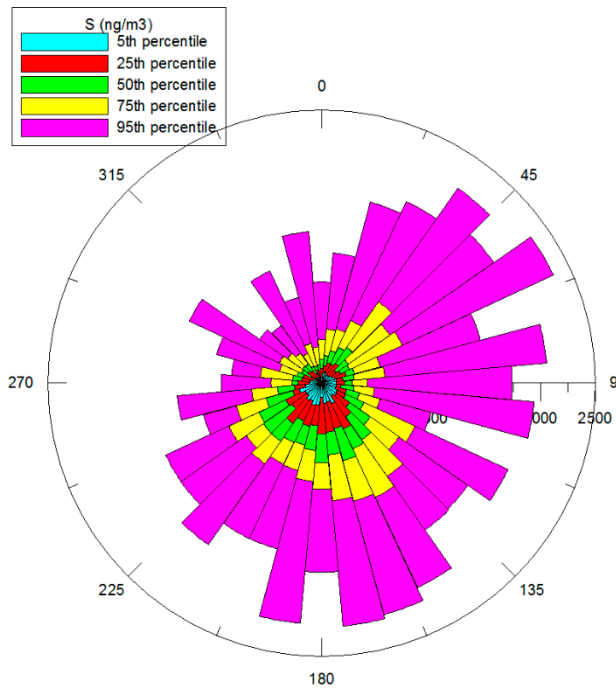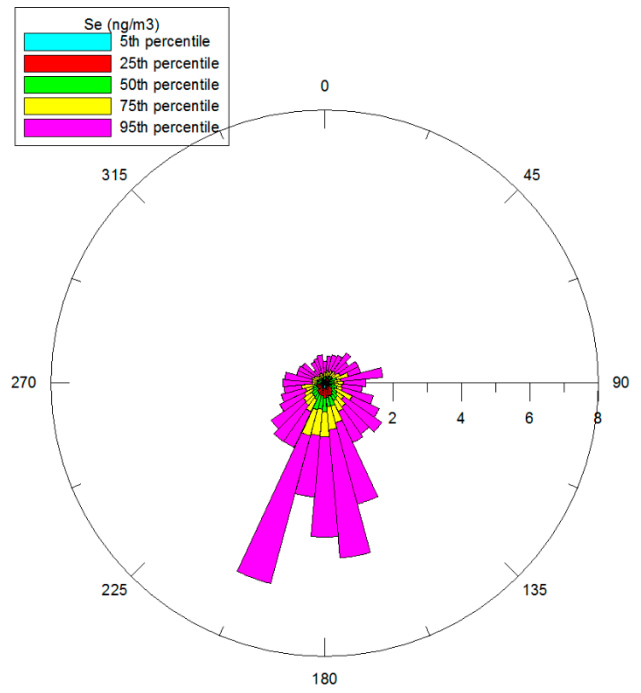

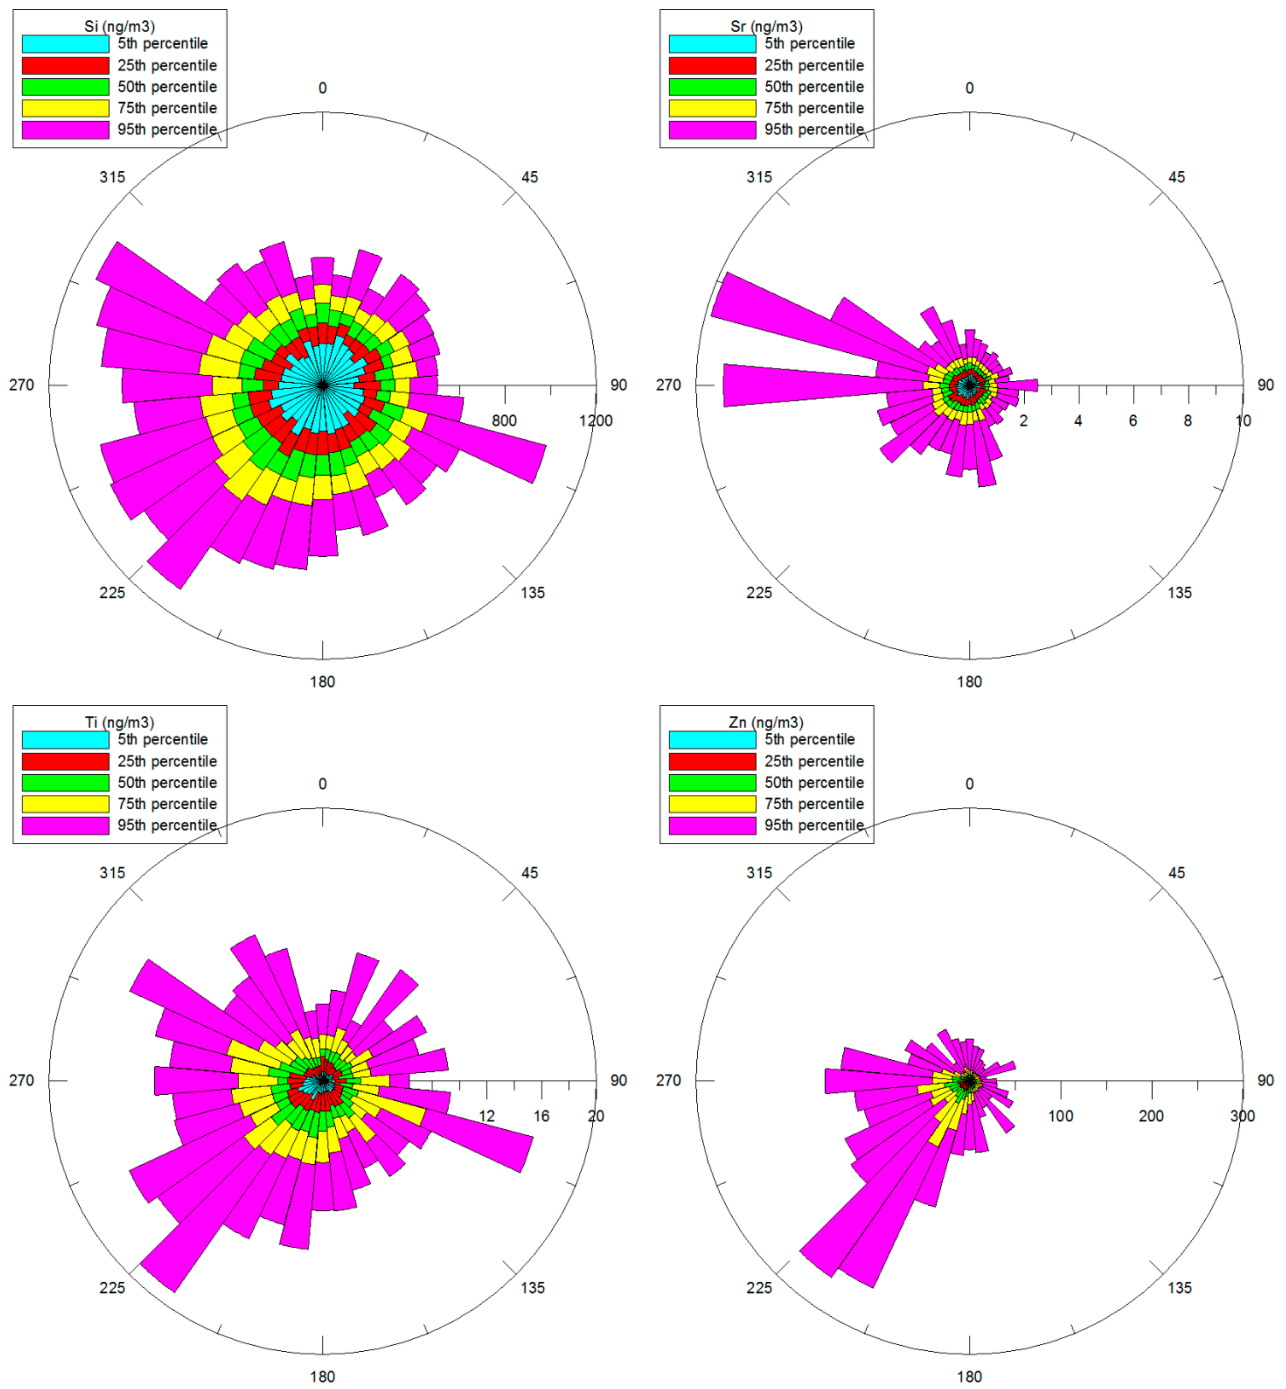

**Figure S6.** Pollution roses of  $\text{PM}_{2.5}$  mass, black carbon, brown carbons, and 14 selected  $\text{PM}_{2.5}$ -bound elements.



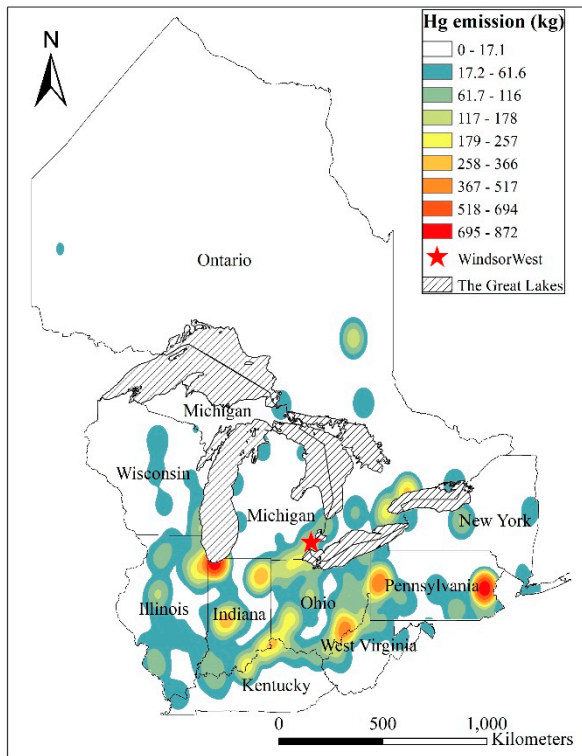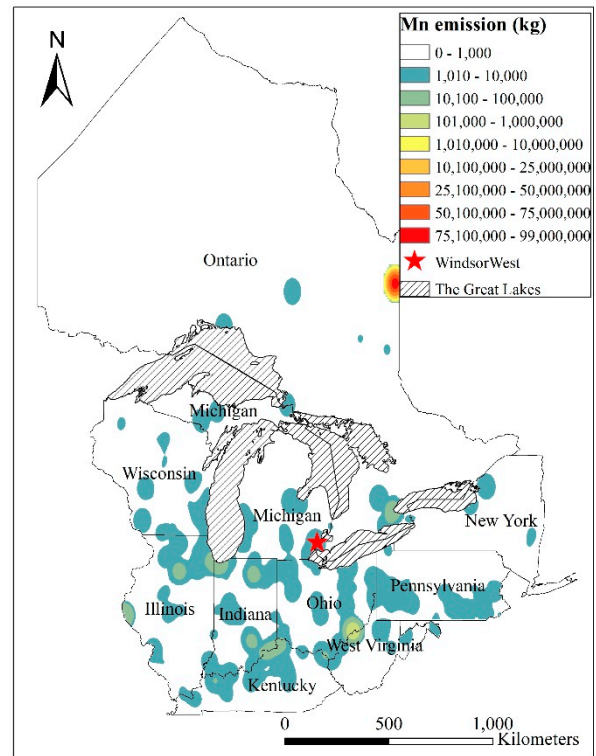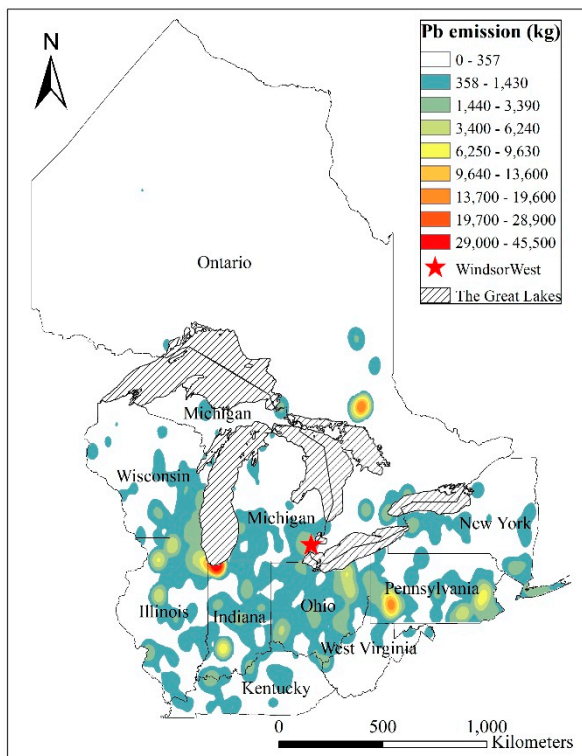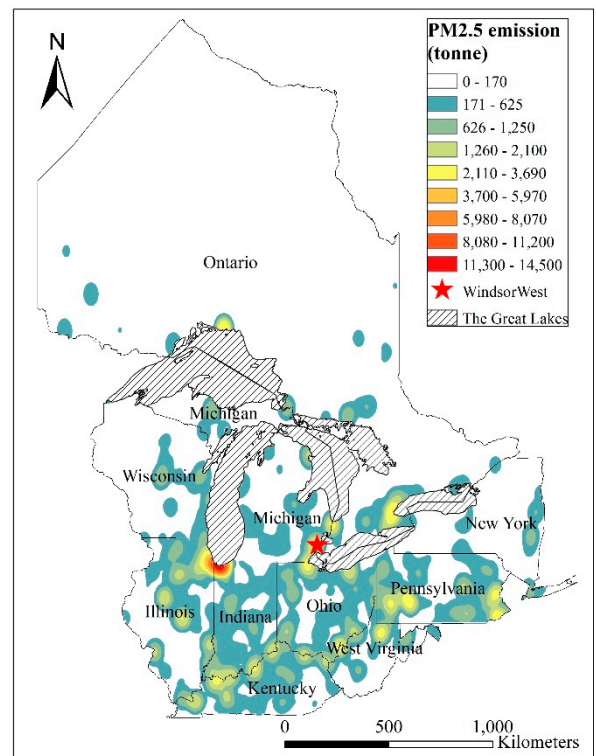

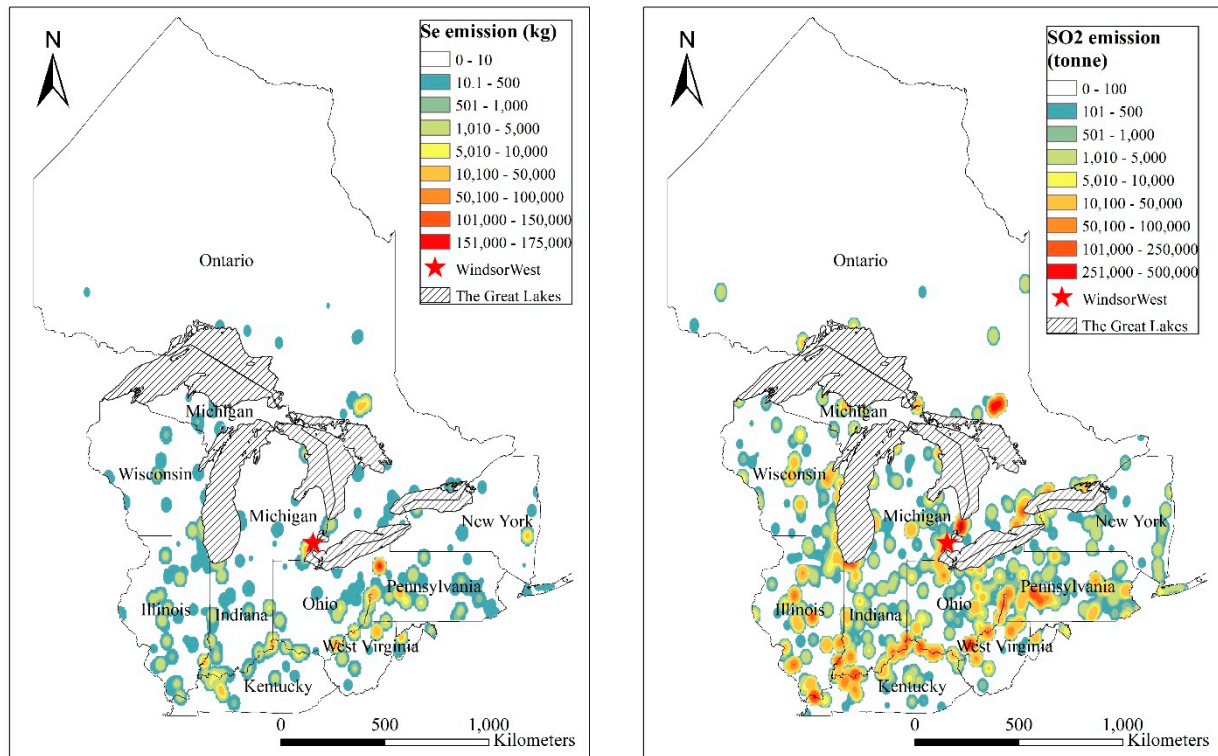

**Figure S7.** NPRI and NEI emission maps of Hg, Mn, Pb, PM<sub>2.5</sub>, Se, and SO<sub>2</sub> in Ontario in 2020 and surrounding nine US states in 2017.

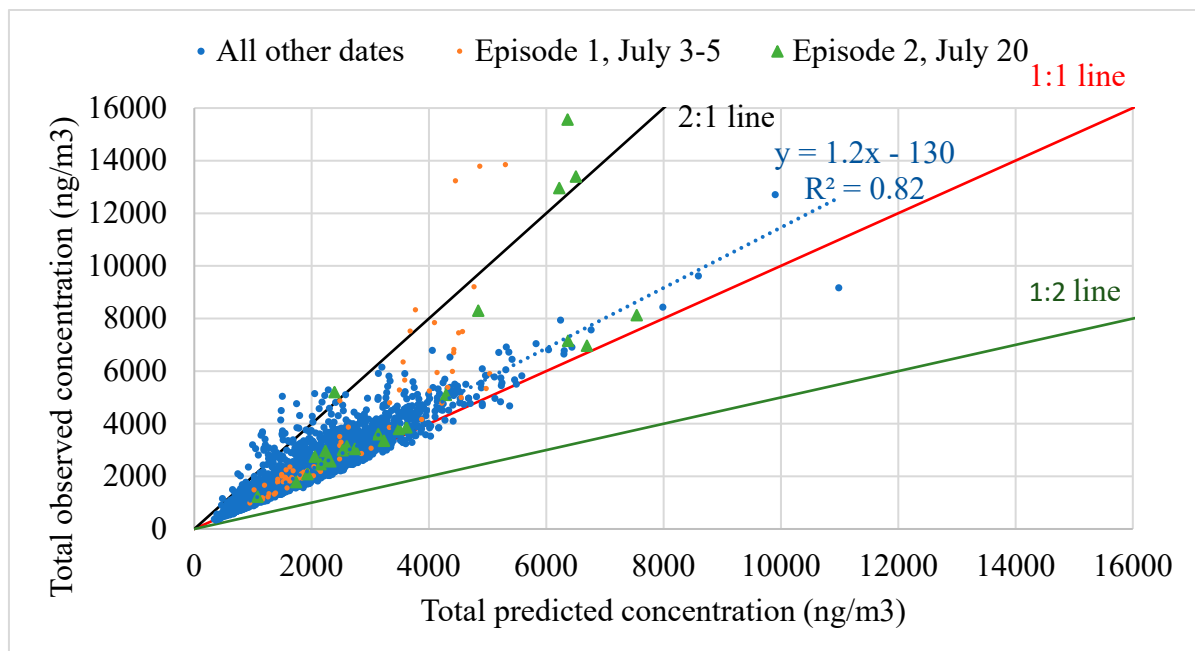

**Figure S8.** Scatter plots of hourly total observed concentrations vs. hourly total predicted concentration. The two episodes are labelled in orange and green, respectively. When concentrations were greater than 4000 ng/m<sup>3</sup>, most of the hourly concentrations during the two episodes deviate further away from the 1:1 line. Episodes were identified with two considerations: (1) hourly concentrations were at least 20 times higher than the averaged concentrations during the study period of April–October 2021 for more than 5 h; and (2) multiple elements simultaneously showed high hourly concentrations.

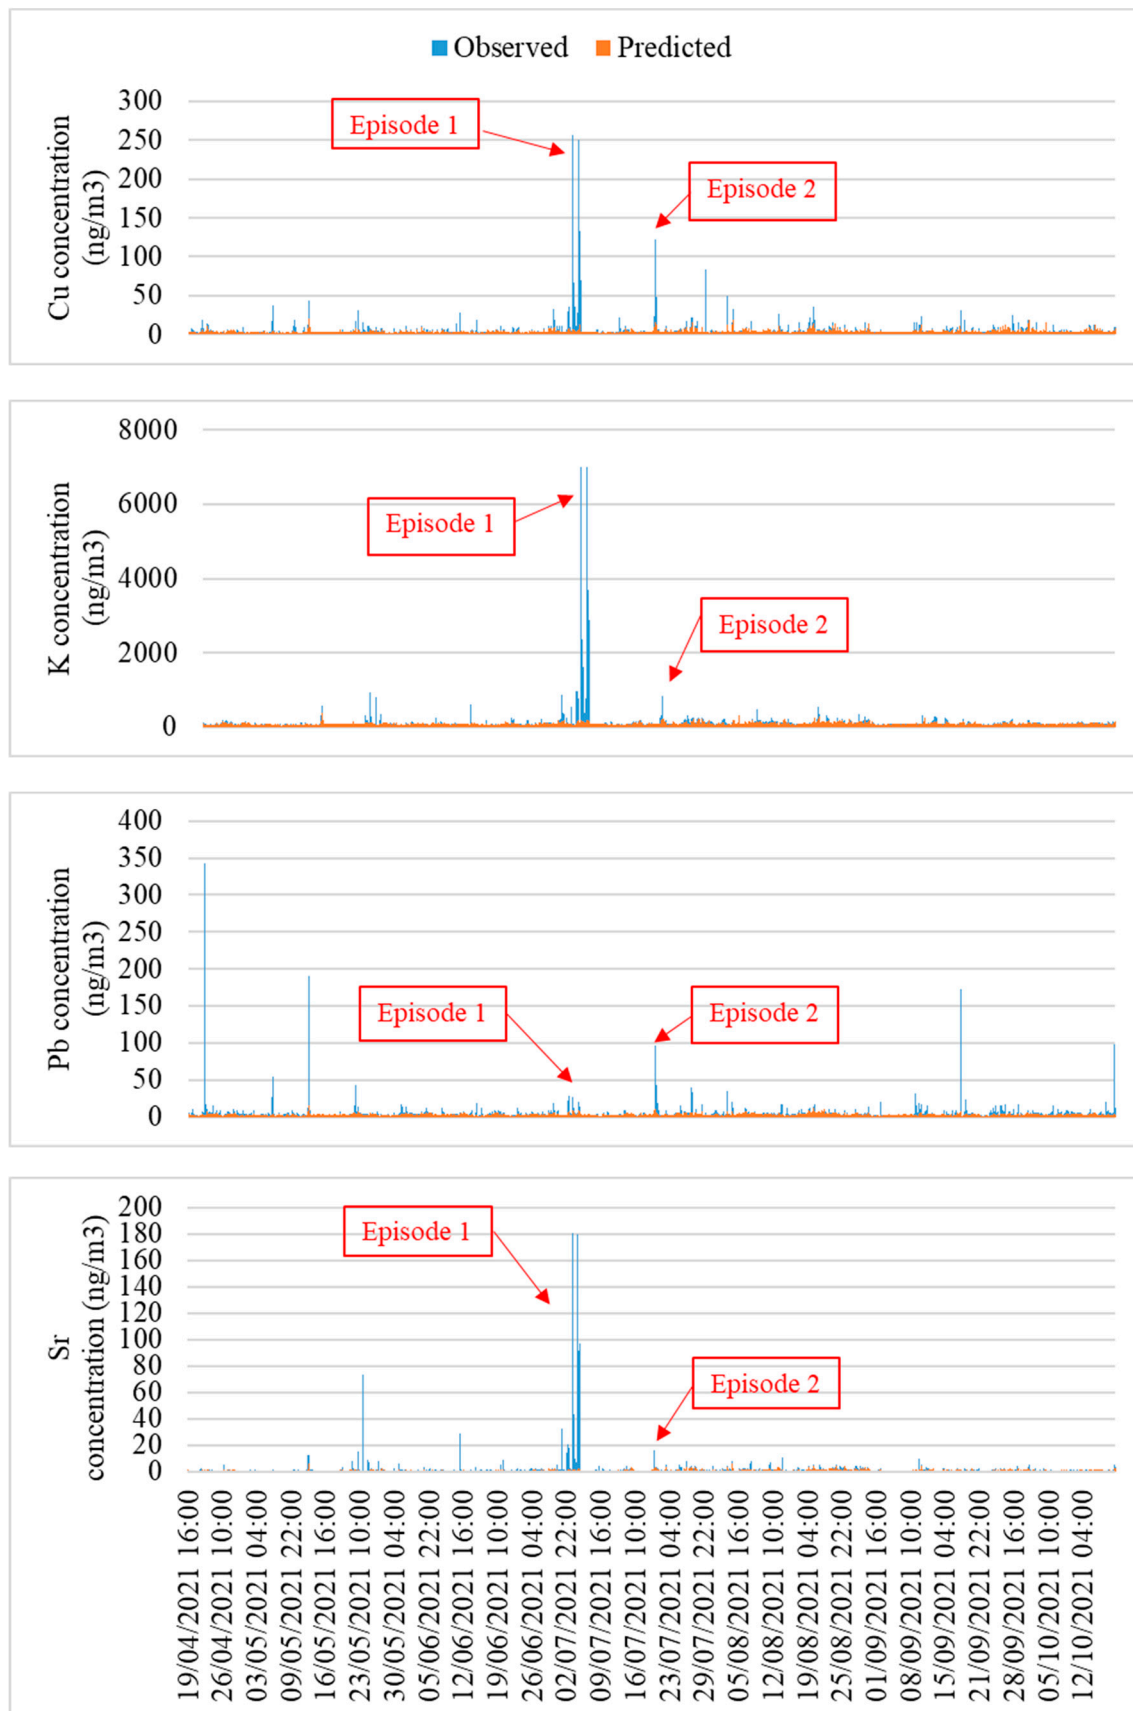

**Figure S9.** Time-series of hourly observed concentrations vs. predicted concentration for Cu, K, Pb and Sr.

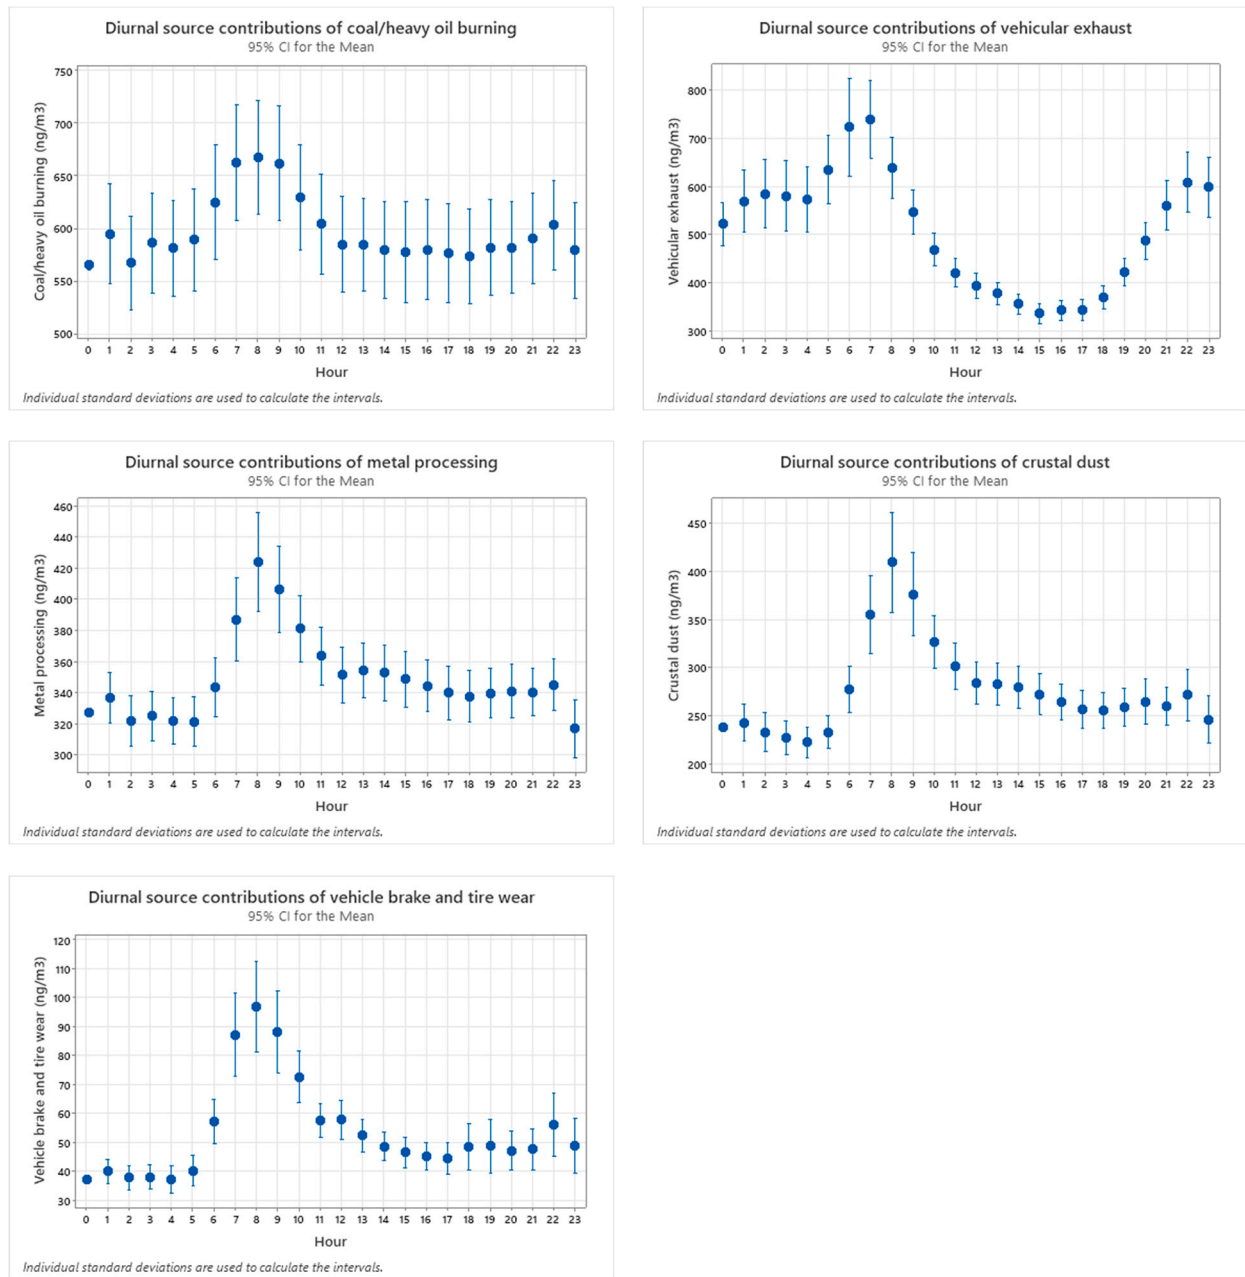

**Figure S10.** Diurnal variations of source contributions (ng/m<sup>3</sup>) of each source in Windsor. The dots indicate the mean values and the error bars represent the 95% confidence intervals.

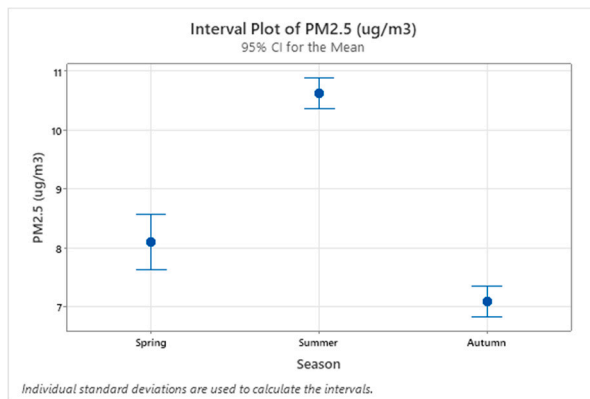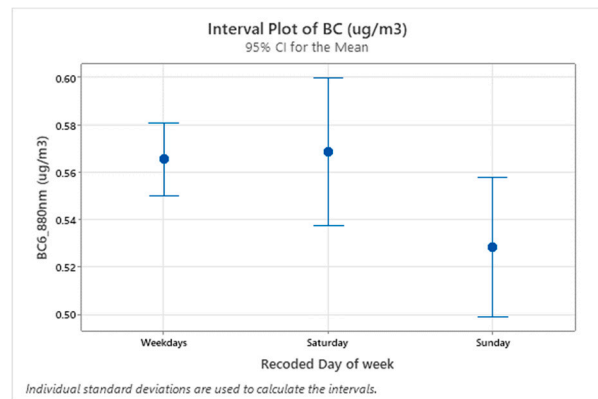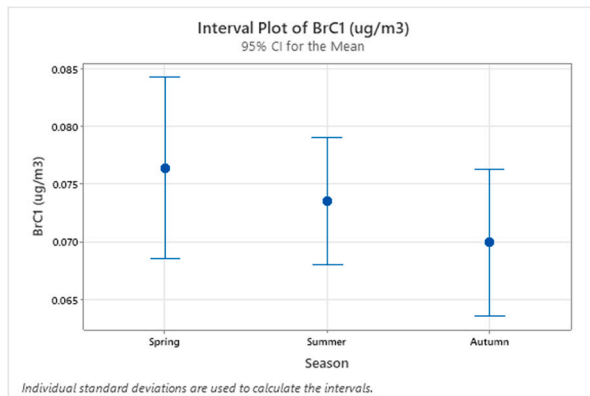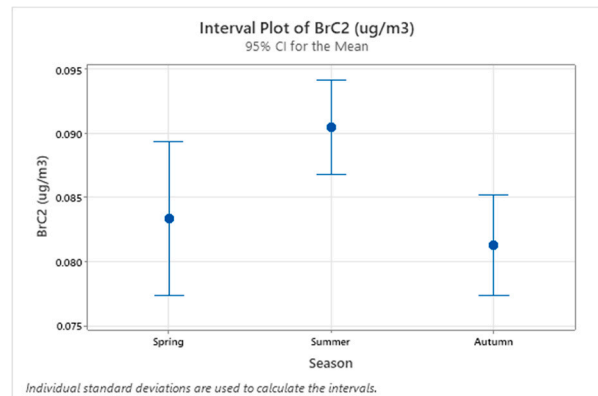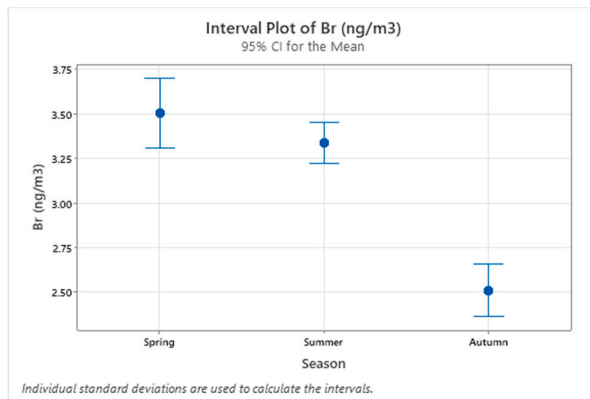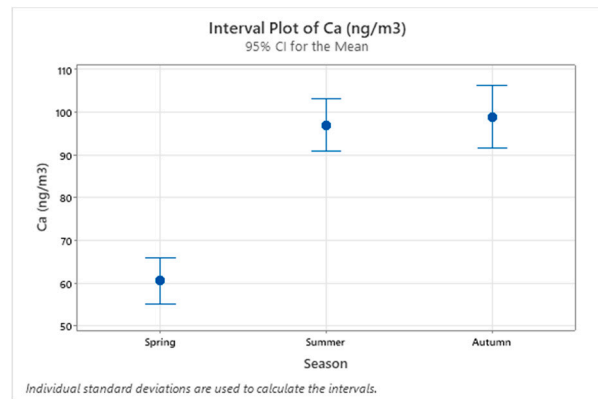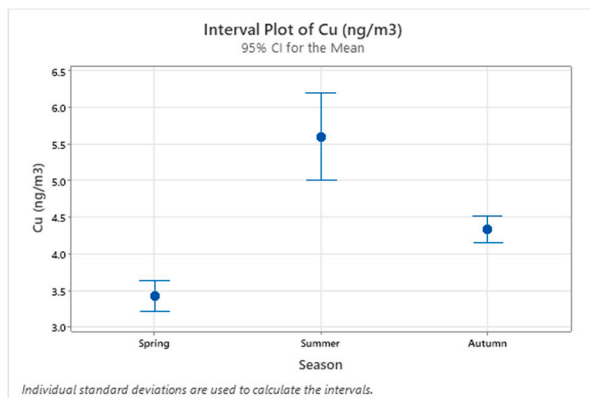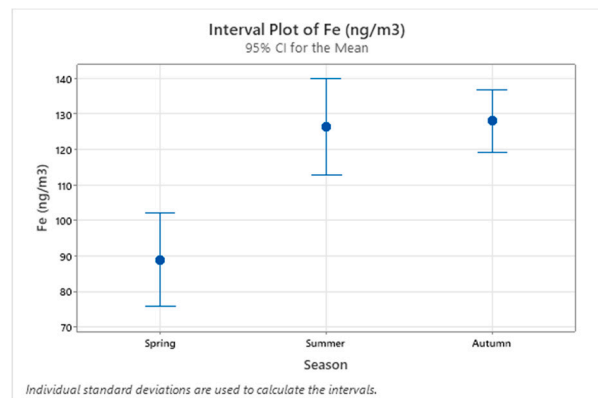

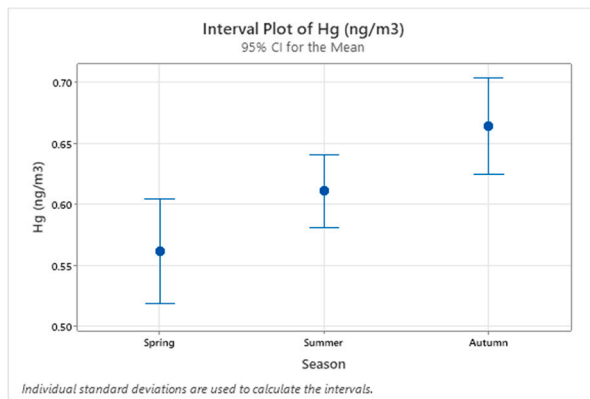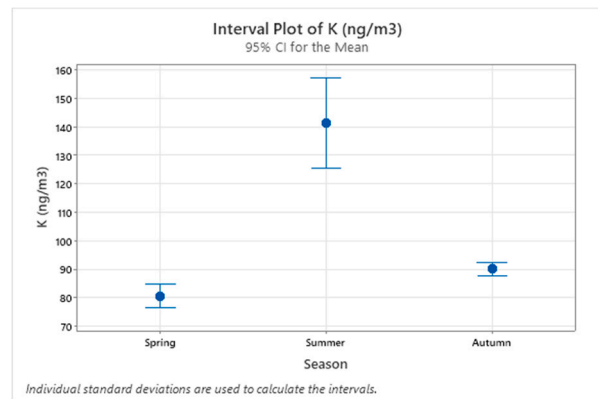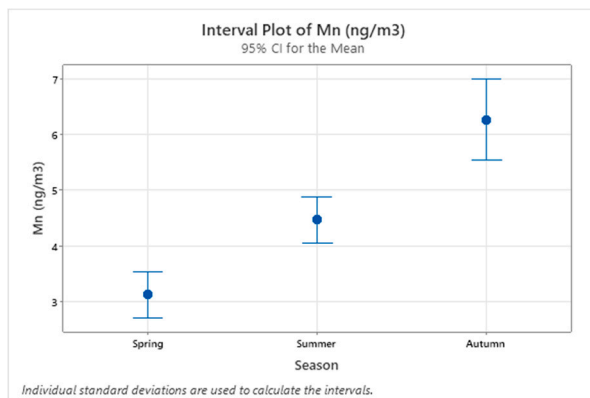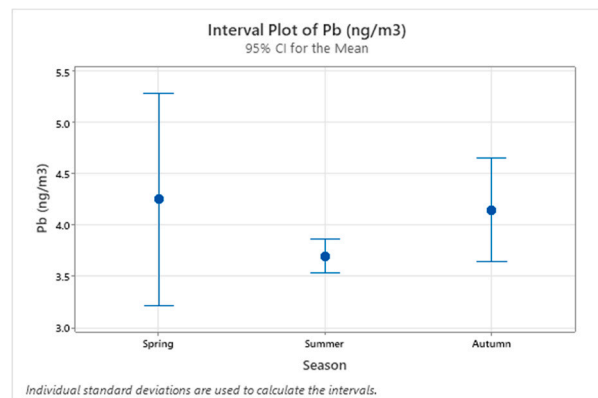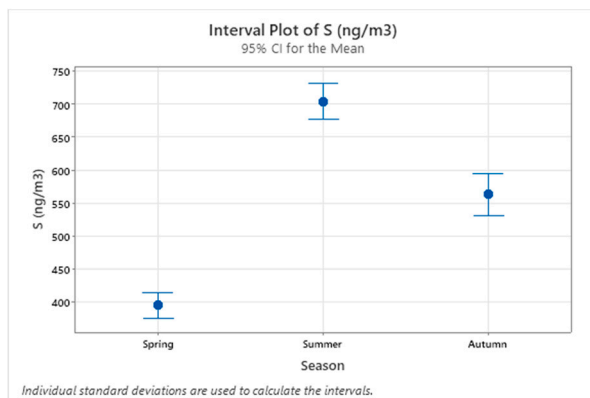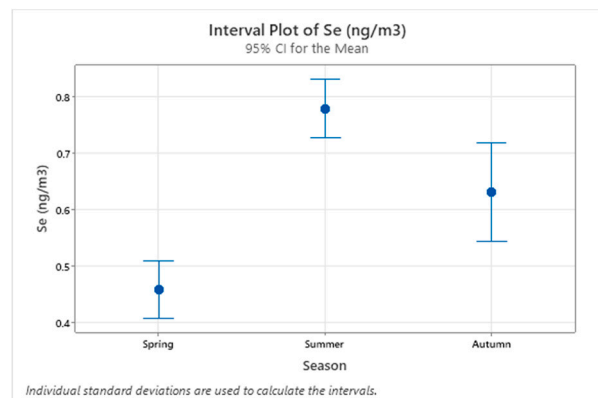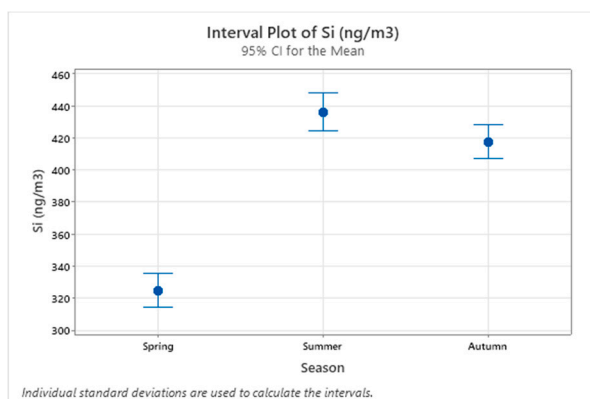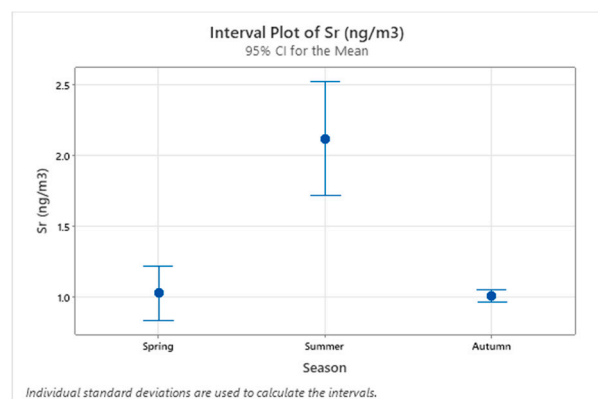



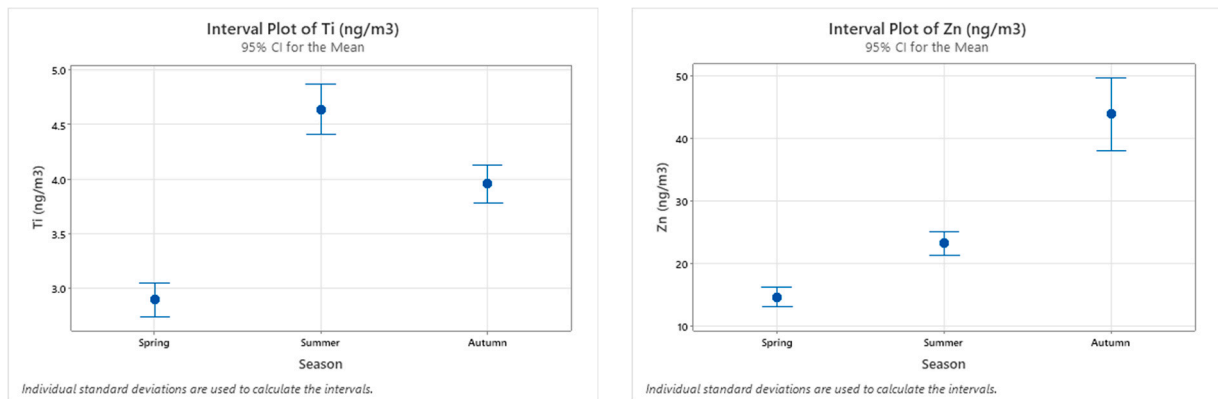

**Figure S11.** Seasonal variations of PM<sub>2.5</sub>, BC, brown carbons (BrC1 and BrC2), and PM<sub>2.5</sub>-bound element concentrations in Windsor during the study period. The dots indicate the mean values and the error bars represent the 95% confidence intervals.

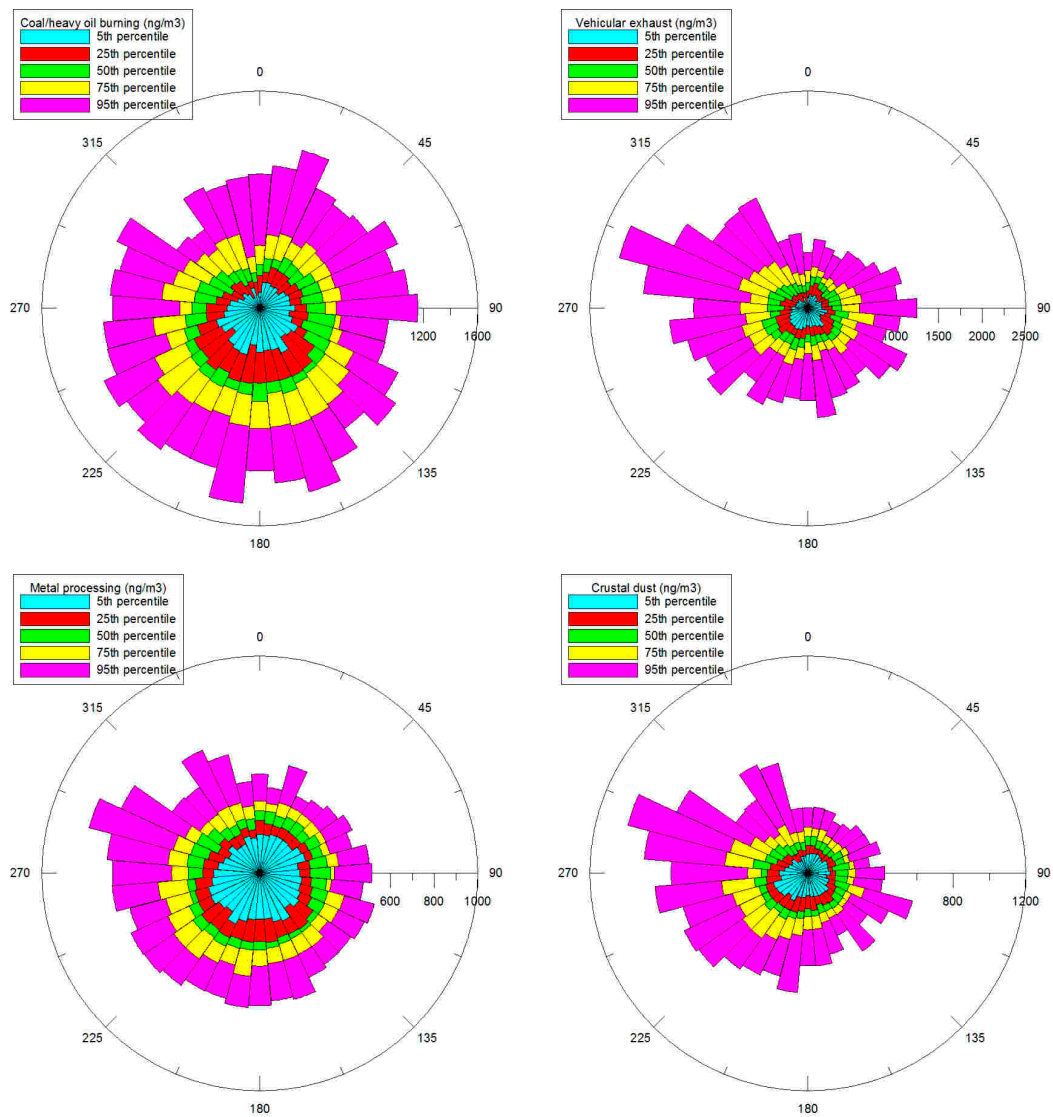

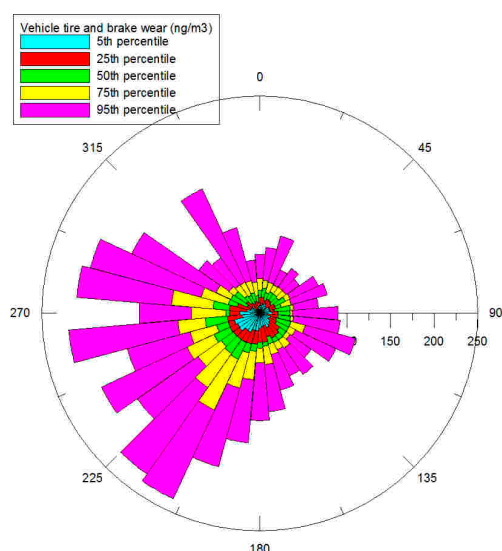

**Figure S12.** Pollution roses of source contributions in Windsor, Canada.

## References

1. United States Environmental Protection Agency (USEPA). EPA positive matrix factorization (PMF) 5.0 fundamentals and user guide. 2014. Available online: [https://www.epa.gov/sites/default/files/2015-02/documents/pmf\\_5.0\\_user\\_guide.pdf](https://www.epa.gov/sites/default/files/2015-02/documents/pmf_5.0_user_guide.pdf) (accessed on 14 October 2022).
2. Wang, H.; Zhang, L.; Cheng, I.; Yao, X.; Dabek-Zlotorzynska, E. Spatiotemporal trends of PM<sub>2.5</sub> and its major chemical components at urban sites in Canada. *J. Environ. Sci.* 2021, 103, 1–11.
3. Shin, S. M., Kim, J. Y., Lee, J. Y., Kim, D. S., & Kim, Y. P. (2022). Enhancement of modeling performance by including organic markers to the PMF modeling for the PM<sub>2.5</sub> at Seoul. *Air Quality, Atmosphere & Health*, 15(1), 91–104.
4. Lee, E., Chan, C. K., & Paatero, P. (1999). Application of positive matrix factorization in source apportionment of particulate pollutants in Hong Kong. *Atmospheric Environment*, 33(19), 3201–3212.
5. Dabek-Zlotorzynska, E.; Dann, T.F.; Martinelango, P.K.; Celo, V.; Brook, J.R.; Mathieu, D.; Ding, L.; Austin, C.C. Canadian National Air Pollution Surveillance (NAPS) PM<sub>2.5</sub> speciation program: Methodology and PM<sub>2.5</sub> chemical composition for the years 2003–2008. *Atmospheric Environ.* 2011, 45, 673–686.
6. Environment and Climate Change Canada (ECCC), (2022). National Air Pollution Surveillance (NAPS) Program. <https://data-donnees.ec.gc.ca/data/air/monitor/national-air-pollution-surveillance-naps-program/ProgramInformation-InformationProgramme/?lang=en>. Last accessed: February 3, 2022.
7. Ontario Ministry of the Environment, Conservation and Parks (MECP), (2019). Ontario's Ambient Air Quality Criteria. <https://www.ontario.ca/page/ontarios-ambient-air-quality-criteria>. Last accessed: October 14, 2022.
